# Supplementary material for: Roles of the 2-Oxoglutarate-Dependent Dioxygenase Superfamily in the Flavonoid Pathway: A Review of the Functional Diversity of F3H, FNS I, FLS, and LDOX/ANS
Source: MDPI journal article supplement (doi:10.3390/molecules26216745), 2021-11-08
Supplement: s1 [file s1]

**Supplementary Table S1. The sequence information used in the phylogenetic tree.**

| Group                | Designation       | Match in NCBI      | Description                        |
|----------------------|-------------------|--------------------|------------------------------------|
| <b>New-type FNSI</b> | <b>SIDMR6-1</b>   | XP_019069725.1     | <i>Solanum lycopersicum</i>        |
|                      | <b>SIDMR6-2</b>   | XP_004241427.1     | <i>Solanum lycopersicum</i>        |
|                      | <b>StDMR6-1</b>   | XP_006347521.1     | <i>Solanum tuberosum</i>           |
|                      | <b>StDMR6-2</b>   | XP_006347314.1     | <i>Solanum tuberosum</i>           |
|                      | <b>NtFNSI</b>     | NP_001239794.1     | <i>Glycine max</i>                 |
|                      | <b>CaFNSI</b>     | XP_027109944.1     | <i>Coffea Arabica</i>              |
|                      | <b>PpFNSI</b>     | XP_007218269.1     | <i>Prunus persica</i>              |
|                      | <b>PtrFNSI</b>    | XP_002321354.3     | <i>Populus trichocarpa</i>         |
|                      | <b>TcFNSI</b>     | EOY23715.          | <i>Theobroma cacao</i>             |
|                      | <b>CsFNSI</b>     | XP_028118921.1     | <i>Camellia sinensis</i>           |
|                      | <b>AtDMR6</b>     | AT5G24530.1        | <i>Arabidopsis thaliana</i>        |
|                      | <b>OsFNSI-1</b>   | LOC_Os03g03034.1   | <i>Oryza sativ</i>                 |
|                      | <b>OsFNSI-2</b>   | LOC_Os04g49194.1   | <i>Oryza sativa</i>                |
|                      | <b>TaS5H</b>      | ABB20895.1         | <i>Triticum aestivum</i>           |
|                      | <b>SbDMR6-1</b>   | Sobic.001G526900.1 | <i>Sorghum bicolor</i>             |
|                      | <b>SbDMR6-2</b>   | Sobic.001G314300.1 | <i>Sorghum bicolor</i>             |
|                      | <b>SbDMR6-3</b>   | Sobic.006G190000.1 | <i>Sorghum bicolor</i>             |
|                      | <b>ZmFNSI-1</b>   | Zm00001d029744     | <i>Zea may</i>                     |
|                      | <b>ZmFNS I -2</b> | Zm00001d027423     | <i>Zea mays</i>                    |
|                      | <b>HvS5H</b>      | BAJ94485.1         | <i>Hordeum vulgare</i>             |
| <b>S3H</b>           | <b>Sis3H</b>      | 7G210600.1         | <i>Setaria italic</i>              |
|                      | <b>ZmS3H</b>      | Zm00001d002564     | <i>Zea mays</i>                    |
|                      | <b>OsDLO</b>      | LOC_Os04g49210.1   | <i>Oryza sativa</i>                |
|                      | <b>HvS3H</b>      | BAJ94485.1         | <i>Hordeum vulgare</i>             |
|                      | <b>PpS3H</b>      | XP_007218269.1     | <i>Prunus persica</i>              |
|                      | <b>PtrS3H</b>     | XP_002317046.3     | <i>Populus trichocarpa</i>         |
|                      | <b>AtS3H</b>      | AT4G10500.1        | <i>Arabidopsis thaliana</i>        |
|                      | <b>AtDLO2</b>     | AT4G10490.1        | <i>Arabidopsis thaliana</i>        |
|                      | <b>VvS3H</b>      | XP_002267625.1     | <i>Vitis vinifera</i>              |
|                      | <b>TcDLO2</b>     | XP_007039319.1     | <i>Theobroma cacao</i>             |
| <b>FNSI</b>          | <b>SmFNSI/F3H</b> | XP_002985262       | <i>Selaginella moellendorffii</i>  |
|                      | <b>PaFNSI/F2H</b> | KJ439220           | <i>Plagiochasma appendiculatum</i> |
|                      | <b>MeFNSI</b>     | QEP99659.1         | <i>Marchantia emarginata</i>       |
|                      | <b>MpFNSI</b>     | QEP99658.1         | <i>Marchantia paleacea</i>         |
|                      | <b>CjFNSI/F2H</b> | QEP99661           | <i>Conocephalum japonicum</i>      |
|                      | <b>CjFNSI</b>     | QEP99662           | <i>Conocephalum japonicum</i>      |
|                      |                   |                    |                                    |

|            |                   |                |                                    |
|------------|-------------------|----------------|------------------------------------|
|            | <b>PaFNSI</b>     | QEP99657.1     | <i>Plagiochasma appendiculatum</i> |
|            | <b>CcFNSI/F2H</b> | QEP99660.1     | <i>Conocephalum conicum</i>        |
|            | <b>DcFNSI</b>     | AF184270       | <i>Daucus carota</i>               |
|            | <b>PcFNSI</b>     | AY817680       | <i>Petroselinum crispum</i>        |
|            | <b>AcFNSI</b>     | DQ683350       | <i>Aethusa cynapium</i>            |
|            | <b>PpFNSI/F3H</b> | XP_001780809   | <i>Physcomitrella patens</i>       |
|            | <b>PrF3H/FNSI</b> | AGY80772       | <i>Pinus radiata</i>               |
|            | <b>PsF3H/FNSI</b> | ABK25766       | <i>Picea sitchensis</i>            |
|            | <b>GbF3H/FNSI</b> | AAU93347       | <i>Ginkgo biloba</i>               |
|            | <b>AgFNSI</b>     | AY817676       | <i>Apium graveolens</i>            |
| <b>F3H</b> | <b>HvF3H</b>      | ACH42080.1     | <i>Hordeum vulgare</i>             |
|            | <b>AmF3H</b>      | AY817678       | <i>Ammi majus</i>                  |
|            | <b>PaF3H</b>      | AY817674       | <i>Pimpinella anisum</i>           |
|            | <b>PcF3H</b>      | AY230248       | <i>Petroselinum crispum</i>        |
|            | <b>AgF3H</b>      | AY817679       | <i>Anethum graveolens</i>          |
|            | <b>AcF3H</b>      | DQ683351       | <i>Aethusa cynapium</i>            |
|            | <b>MtF3H</b>      | 8g024120.1     | <i>Medicago truncatula</i>         |
|            | <b>VvF3H</b>      | NP001268034.1  | <i>Vitis vinifera</i>              |
|            | <b>CsF3Ha</b>     | KY615688       | <i>Camellia sinensis</i>           |
|            | <b>CsF3Hb</b>     | KY615689       | <i>Camellia sinensis</i>           |
|            | <b>AtF3H</b>      | NP_190692      | <i>Arabidopsis thaliana</i>        |
|            | <b>SbF3H</b>      | ADB66755.1     | <i>Sorghum bicolor</i>             |
|            | <b>ZmF3H</b>      | NM_001136803   | <i>Zea mays</i>                    |
|            | <b>OsF3H</b>      | XM_015779149   | <i>Oryza sativa</i>                |
|            | <b>TaF3H</b>      | ABR13013.1     | <i>Triticum aestivum</i>           |
|            | <b>DuF3H</b>      | comp23389      | <i>Desmodium uncinatum</i>         |
| <b>ANS</b> | <b>NtANS</b>      | XP_009604108.1 | <i>Nicotiana tomentosiformis</i>   |
|            | <b>AtANS</b>      | NP_001031700   | <i>Arabidopsis thaliana</i>        |
|            | <b>CsANSa</b>     | KY615704       | <i>Camellia sinensis</i>           |
|            | <b>CsANSb</b>     | KY615703       | <i>Camellia sinensis</i>           |
|            | <b>VvANS</b>      | RVW17740.1     | <i>Vitis vinifera</i>              |
|            | <b>GmANS</b>      | NP_001239794.1 | <i>Glycine max</i>                 |
|            | <b>MtANS</b>      | XP_003611189.1 | <i>Medicago truncatula</i>         |
|            | <b>DuANS</b>      | comp23380      | <i>Desmodium uncinatum</i>         |
|            | <b>GmLDOX</b>     | NP_001241248.1 | <i>Glycine max</i>                 |
|            | <b>CsFLSa:</b>    | KY615705       | <i>Camellia sinensis</i>           |
|            | <b>CsFLSb</b>     | KY615707       | <i>Camellia sinensis</i>           |
|            | <b>CsFLSc</b>     | KY615706       | <i>Camellia sinensis</i>           |
|            | <b>GsFLS</b>      | KHN35581       | <i>Glycine soja</i>                |
|            | <b>FaFLS</b>      | ABH07784       | <i>Fragaria x ananassa</i>         |

---

|            |               |                |                             |
|------------|---------------|----------------|-----------------------------|
| <b>FLS</b> | <b>PpFLS</b>  | AJO70134       | <i>Prunus persica</i>       |
|            | <b>DuFLS</b>  | comp24814      | <i>Desmodium uncinatum</i>  |
|            | <b>AtFLS1</b> | AED91333       | <i>Arabidopsis thaliana</i> |
|            | <b>VvFLS1</b> | AB086055       | <i>Vitis vinifera</i>       |
|            | <b>DuLDOX</b> | comp23594      | <i>Desmodium uncinatum</i>  |
|            | <b>VvLDOX</b> | RVW17740.1     | <i>Vitis vinifera</i>       |
|            | <b>MtLDOX</b> | XP_003601080.1 | <i>Medicago truncatula</i>  |

---
